# Supplementary material
Source: publisher figshare collection journal article supplement (https://gsajournals.figshare.com/ndownloader/files/26384554)
Supplement: Supplementary file 1 [file 26384554]

## Sheet: S4. LOFmutsinClade2
Supplementary Table 4. Genes with loss-of-function mutations in isolates from Clade II
Gene ID	Amino acid change	Codon change	Description	C. albicans homolog	S. cerevisiae homolog
B9J08_000131T0	Q630*	Cag/Tag	Putative GTPase-activating protein (GAP) for Rho-type GTPase Cdc42; involved in cell signaling pathways controlling cell polarity; induced by low-level peroxide stress; flow model biofilm induced	C4_02000C_A/RGA2	RGA2
B9J08_000232T0	Y10*	taC/taG	Protein with a predicted role in sister chromatid cohesion and telomere length maintenance; cell-cycle regulated periodic mRNA expression	C7_00370W_A/DCC1	DCC1
B9J08_000479T0	R49*	Cga/Tga	Putative ABC transporter superfamily; fluconazole, Sfu1, Hog1, core stress response induced; caspofungin repressed; fluconazole resistance not affected by mutation or correlated with expression; rat catheter and flow model biofilm induced	C1_08070W_A/CDR4	PDR15
B9J08_000672T0	E260*	Gaa/Taa	Protein of unknown function	.	.
B9J08_000859T0	K294*	Aag/Tag	Protein of unknown function	.	.
B9J08_000863T0	W148*	tGg/tAg	Putative GABA transaminase; transcription regulated by Mig1 and Tup1; stationary phase enriched protein; rat catheter and Spider biofilm induced	C2_04190C_A/UGA1	UGA1
B9J08_000898T0	R123*	Cga/Tga	Ortholog(s) have tRNA-specific adenosine-37 deaminase activity and role in tRNA modification	C7_00130W_A	TAD1
B9J08_001082T0	Q734*	Cag/Tag	Ortholog(s) have role in TOR signaling, actin cytoskeleton organization, actin filament bundle assembly, eisosome assembly, endosomal transport and establishment or maintenance of actin cytoskeleton polarity	C6_02060W_A/SLM2	SLM2
B9J08_001196T0	K2*	Aag/Tag	Protein of unknown function	orf19.7114/CSA1	.
B9J08_001546T0	Q23*	Cag/Tag	Has domain(s) with predicted aspartic-type endopeptidase activity and role in proteolysis	orf19.242/SAP8	YPS3
B9J08_001665T0	Q331*	Cag/Tag	Putative glucanase; induced during cell wall regeneration	CR_09420C_A/BGL22	.
B9J08_002119T0	Y590*	taT/taA	Protein of unknown function; rat catheter biofilm repressed	C7_03550C_A	.
B9J08_002136T0	Q192*	Cag/Tag	Zn(II)2Cys6 transcription factor; regulator of white-opaque switching; required for maintenance of opaque state; Hap43-induced	C3_05170W_A/WOR2	ARG81
B9J08_002281T0	S1121*	tCa/tGa	Protein similar to S. cerevisiae Taf145p, a component of RNA polymerase II transcription factor TFIID; flucytosine repressed; likely to be essential for growth, based on an insertional mutagenesis strategy	C1_07110W_A/TAF145	TAF1
B9J08_002330T0	L192*	tTa/tAa	Ortholog of Candida lusitaniae ATCC 42720 : CLUG_04267	.	.
B9J08_002684T0	Y54*	taC/taA	Putative transcription factor involved in transcription of N-acetylglucosamine-inducible genes; involved in negative regulation of MDR1 transcription; mutants show increased resistance to azole drugs	CR_00140W_A/REP1	.
B9J08_002835T0	Y178*	taC/taG	Protein with B-cell receptor-associated protein 31-like domain; membrane-localized protein	C4_00410W_A	YET1
B9J08_002928T0	L436*	tTg/tAg	Putative transporter; decreased transcription is observed upon fluphenazine treatment	C5_01470C_A	AVT2
B9J08_002956T0	E404*	Gag/Tag	Putative peptide:N-glycanase; gene has variable numbers of 12-bp repeats; induced by caspofungin, ciclopirox olamine, ketoconazole or hypoxia; gene of core caspofungin response; Hap43-induced; Spider biofilm induced	C2_05660W_A/PNG2	.
B9J08_003113T0	R775*	Aga/Tga	Plasma membrane-localized protein of unknown function; Hap43p-repressed gene	C5_04050W_A	NVJ2
B9J08_003498T0	Q424*	Caa/Taa	Putative transcription factor with zinc finger DNA-binding motif; similar to bacterial DnaJ; induced in low iron	CR_03240C_A	JJJ1
B9J08_003836T0	Q101*	Caa/Taa	N-acetylglucosamine (GlcNAc) kinase; involved in GlcNAc utilization; required for wild-type hyphal growth and mouse virulence; GlcNAc-induced transcript; induced by alpha pheromone in SpiderM medium	C6_04580W_A/HXK1	HXK1
B9J08_003912T0	Q34*	Caa/Taa	Has domain(s) with predicted aspartic-type endopeptidase activity and role in proteolysis	orf19.6928/SAP9	YPS1
B9J08_004023T0	K729*	Aag/Tag	Ortholog(s) have actin filament binding activity, role in mitochondrion migration along actin filament, negative regulation of actin filament polymerization and Aim21-Tda2 complex, actin cortical patch localization	C1_10090C_A	AIM21
B9J08_004290T0	W15*	tGg/tAg	Protein of unknown function	.	.
B9J08_004429T0	W27*	tGg/tAg	Ortholog(s) have L-methionine transmembrane transporter activity and role in methionine import across plasma membrane	C3_03230C_A	MUP3
B9J08_004537T0	Y817*	taC/taA	Has domain(s) with predicted role in transmembrane transport	orf19.3746/OPT2	OPT2
B9J08_004602T0	W621*	tGg/tAg	Oligopeptide transporter; transports 3-to-5-residue peptides; alleles are distinct, one has intron; suppresses S. cerevisiae ptr2-2 mutant defects; induced by BSA or peptides; Stp3p, Hog1p regulated; flow model biofilm induced	CR_02020C_A/OPT1	OPT1
B9J08_004790T0	R234*	Cga/Tga	Protein of unknown function	.	.
B9J08_005169T0	Q320*	Cag/Tag	Ortholog of S. cerevisiae : CAJ1, C. albicans SC5314 : C4_05810W_A, C. glabrata CBS138 : CAGL0J02750g, C. dubliniensis CD36 : Cd36_45380 and C. parapsilosis CDC317 : CPAR2_500650	C4_05810W_A	CAJ1
B9J08_005173T0	K157*	Aaa/Taa	Protein of unknown function	.	.
B9J08_005232T0	E639*	Gaa/Taa	Ortholog(s) have ubiquitin-ubiquitin ligase activity, role in ATP export, mitochondrion inheritance, protein monoubiquitination, protein polyubiquitination, ubiquitin-dependent endocytosis and ubiquitin ligase complex localization	C4_01560C_A	BUL1
B9J08_005262T0	Q196*	Cag/Tag	Membrane protein required for mating; ortholog of S. cerevisiae Fus1; transcript induced by Cph1 in cells homozygous for the MTLa locus; alpha factor induced	C1_11630C_A/FUS1	FUS1
B9J08_005292T0	E85*	Gaa/Taa	Protein lacking an ortholog in S. cerevisiae; transposon mutation affects filamentous growth; flow model biofilm induced	C2_06180C_A/FGR12	.
B9J08_005388T0	R384*	Aga/Tga	Protein of unknown function; flow model biofilm induced	C6_01590W_A	PDP3
B9J08_005550T0	W493*	tGg/tAg	Has domain(s) with predicted RNA binding activity	orf19.5281	SCP160
